# Supplementary material
Source: publisher site journal article supplement (https://www.spandidos-publications.com/3380/downloadSupplementary)

Figure S1. Temperature diagram. Recording of changes in rectal temperature during hypothermic treatment and rewarming. Values are expressed as the mean  $\pm$  standard error of the mean. Groups: Normo., Normothermia + CA; Hypo., TH after return of spontaneous circulation following CA. TH, therapeutic hypothermia; CA, cardiac arrest.

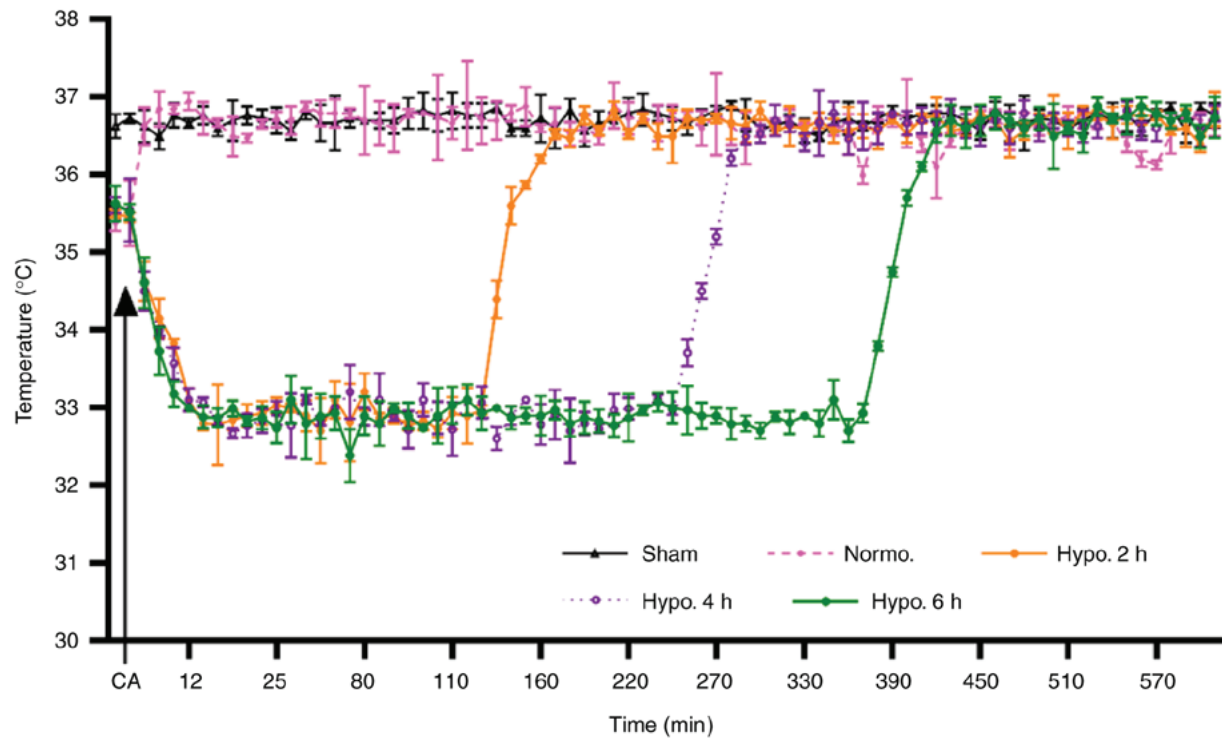

Supplement: Supplementary file 1 [file downloadSupplementary]
